# Supplementary material for: Synthesis of Ag–Ni core–shell nanowires and their application in anisotropic transparent conductive films
Source: Royal Society of Chemistry journal article supplement (doi:10.1039/c4ra11866a), 2014-11-28
Supplement: c4ra11866a1.pdf [file c4ra11866a1.pdf]

## Supporting Information

### Synthesis of Ag-Ni core-shell nanowires and their application in anisotropic transparent conductive films

Bo-Tau Liu,<sup>1,\*</sup> Shao-Xian Huang,<sup>1</sup> Mei-Feng Lai,<sup>2,3</sup> and Zung-Hang Wei<sup>2</sup>

<sup>1</sup>Department of Chemical and Materials Engineering, National Yunlin University of Science and Technology, Yunlin 64002, Taiwan

<sup>2</sup>Institute of NanoEngineering and MicroSystems, National Tsing Hua University, Hsinchu 30013, Taiwan

<sup>3</sup>Department of Power Mechanical Engineering, National Tsing Hua University, Hsinchu 30013, Taiwan

\*Corresponding author. E-mail address: liubo@yuntech.edu.tw (Bo-Tau Liu)

#### List of contents

---

Preparation of silver nanowires

Fig.S1. XRD patterns of AgNWs and Ag-Ni core-shell nanowires.

Fig.S2. UV-Vis spectra of AgNWs and Ag-Ni core-shell nanowires.

## Preparation of silver nanowires

AgNWs were synthesized using a polyol reduction method as reported in our previous study.<sup>1,2</sup> Briefly, 0.3 M PVP (36 mL) and 0.2 M NaCl EG solution (80  $\mu$ L) were mixed in a reaction vessel and then heated at 160 °C. 1 M AgNO<sub>3</sub> EG solution (20  $\mu$ L) was added into the mixture. After 5 min, 1 M AgNO<sub>3</sub> (4 mL) was added slowly using a peristaltic pump. When the color of the solution turned to a misty auburn, the residual AgNO<sub>3</sub> solution was added into the vessel immediately. The as-prepared AgNWs were washed three times with EG through centrifugation.

## References

1. B.-T. Liu and H.-L. Kuo, *Carbon*, 2013, **63**, 390-396.
2. B.-T. Liu and S.-X. Huang, *RSC Adv.*, 2014, **4**, 59226-59232.

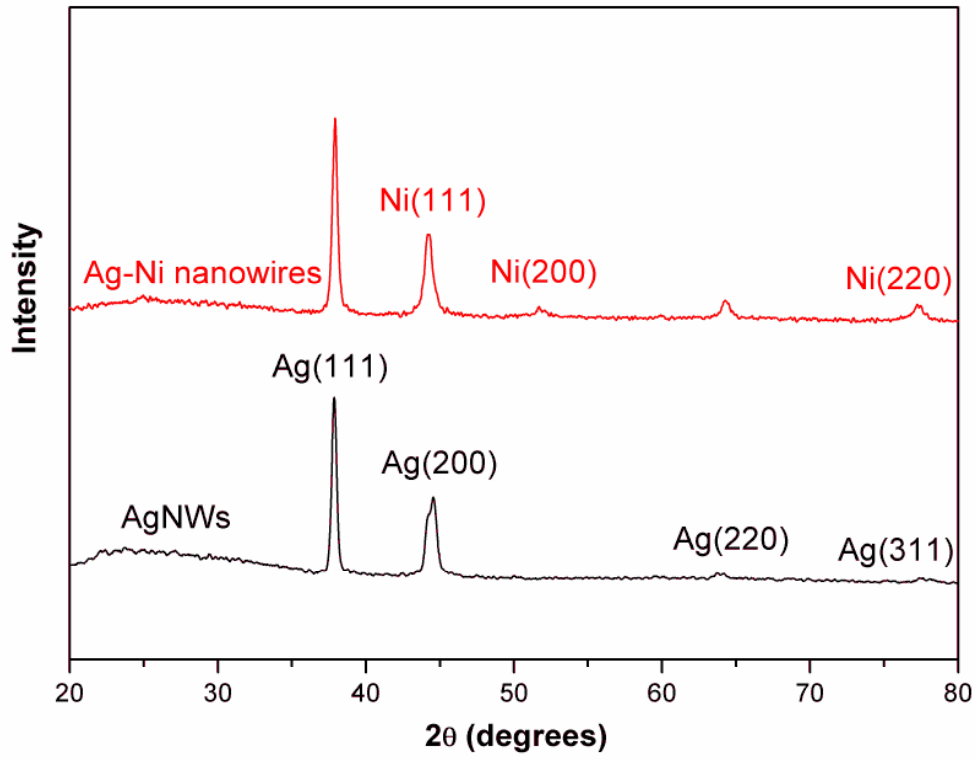

Fig.S1. XRD patterns of AgNWs and Ag-Ni core-shell nanowires.

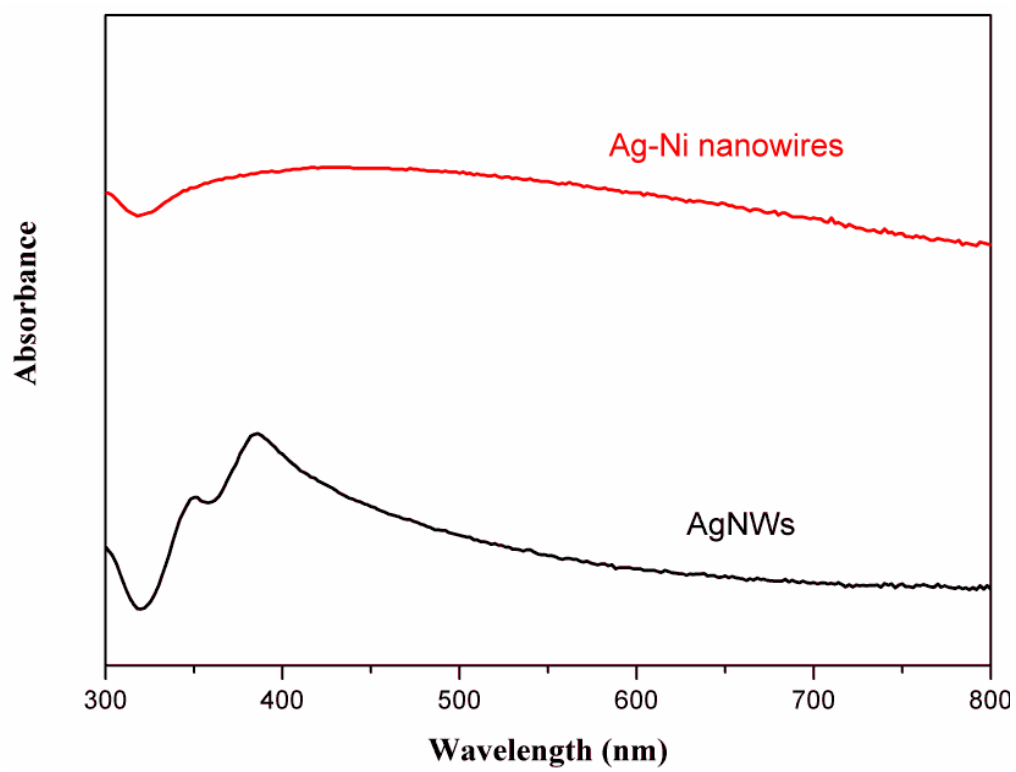

Fig.S2. UV-Vis spectra of AgNWs and Ag-Ni core-shell nanowires.
